# Supplementary material for: Unraveling the origin of broadband yellow emission in Bi3+-doped LuXnGaO4 (Xn = Mg, Zn) phosphors
Source: Royal Society of Chemistry journal article supplement (doi:10.1039/d3dt03507g), 2024-01-01
Supplement: d3dt03507g1.pdf [file d3dt03507g1.pdf]

# Unraveling the Origin of the Broadband Yellow Emission in Bi<sup>3+</sup>-doped LuXnGaO<sub>4</sub> (Xn = Mg, Zn) Phosphors

Wanying Geng,<sup>a</sup> Xufeng Zhou,<sup>a</sup> Jianyan Ding<sup>b</sup> and Quansheng Wu <sup>\*b</sup>

<sup>a</sup> College of Materials Science and Engineering, Liaocheng University, Liaocheng, Shandong, 252000, China

<sup>b</sup> College of Chemistry & Materials Science, Longyan University, Longyan, Fujian, 364000, China

\*Address correspondence to E-mail: [wuqsh1989@qq.com](mailto:wuqsh1989@qq.com)

## Experiment section

### Material and preparation

A series of samples of LuXnGaO<sub>4</sub>:xBi<sup>3+</sup> (Xn = Mg, Zn) ( $x = 0, 0.0015, 0.003, 0.0045, 0.006, 0.0075$  and  $0.009$ ) were synthesized by high temperature solid-state reaction method. The raw materials are Lu<sub>2</sub>O<sub>3</sub> ( $\geq 99.0\%$ , Aladdin), MgCO<sub>3</sub> ( $\geq 99.5\%$ , Aladdin), ZnCO<sub>3</sub> ( $\geq 99.5\%$ , Aladdin), Ga<sub>2</sub>O<sub>3</sub> (99.5%, Aladdin), Bi<sub>2</sub>O<sub>3</sub> (99.99%, Aladdin) were homogeneously mixed and finely ground in an agate mortar containing ethanol as the dispersing medium. H<sub>3</sub>BO<sub>3</sub> (Sinopharm Chemical) was used as a fluxing solvent with a mass fraction of 5, after which they were dried and packed in aluminum oxide crucibles. The powder mixture was sintered in a high-temperature tube furnace at 1350°C for 4 h under air atmosphere and the heating rate was 10°C/min. The resulting samples after cooling were reground into powder for further characterization analysis.

### Measurements and characterization

All the measurements were conducted at room temperature. The X-ray powder diffraction (XRD) (D2 PHASER X-ray Diffractometer, Germany) with a graphite monochromator using Cu K $\alpha$  radiation ( $\lambda = 1.54056$  Å), operating at 30 kV and 15 mA was employed to identify the phase formation and crystal structure of the samples. The Rietveld method was employed to perform the structure refinement by the program of the General Structure Analysis System. The band structure for the sample was

calculated with density functional theory and performed with the Cambridge Serial Total Energy Package code. The theoretical basis of density was used for local-density approximation. The photoluminescence (PL) and PL excitation (PLE) spectra were obtained using a FLS-920T fluorescence spectrophotometer equipped with a 450 W Xe light source and double excitation monochromators. The luminescence intensities of the samples depending on the temperature were carried out using an aluminum plaque with cartridge heaters; the temperature was measured by thermocouples inside the plaque and controlled by a standard TAP-02 high temperature fluorescence controller. The diffusion reflectance spectra (DRS) were measured on an UV-vis spectrophotometer (PE Lambda 950). The powder morphology was investigated using scanning electron microscopy (SEM; S-3400, Hitachi, Japan).

The band structure for the sample was calculated with density functional theory and performed with the Cambridge Serial Total Energy Package (CASTEP) code. The theoretical basis of density was used for local-density approximation (LDA).

The bandgap is calculated by the following equations:

$$(\alpha hv)^n = A(hv - E_g) \quad (1)$$

$$\alpha = \frac{(1 - R)^2}{2R} \quad (2)$$

Where  $\alpha$  is the absorption coefficient,  $hv$  is the incident photo energy,  $A$  is a constant, and  $n = 1/2$  for direct bandgap.

**Table S1** Unit cell data of LuXnGaO<sub>4</sub>:Bi<sup>3+</sup>

|                               | LuMgGaO <sub>4</sub>         | LuMgGaO <sub>4</sub> :Bi <sup>3+</sup> | LuZnGaO <sub>4</sub>         | LuZnGaO <sub>4</sub> :Bi <sup>3+</sup> |
|-------------------------------|------------------------------|----------------------------------------|------------------------------|----------------------------------------|
| Crystal system                | trigonal                     | trigonal                               | trigonal                     | trigonal                               |
| Space-group                   | R -3 m (166)                 | R -3 m (166)                           | R -3 m (166)                 | R -3 m (166)                           |
| Cell parameters (Å)           | a=3.3880(1),<br>c=25.2146(5) | a=3.3890(2)<br>25.2217(18)             | a=3.3984(0),<br>c=25.2214(6) | 3.3986(0)<br>25.2216(6)                |
| Cell volume (Å <sup>3</sup> ) | 250.65 (1)                   | 250.87(4)                              | 252.27(1)                    | 252.29(1)                              |
| Z                             | 3                            | 3                                      | 3                            | 3                                      |

Calc. density (g/cm<sup>3</sup>)    6.61768                    6.61196                    7.38625                    7.38567

**Table S2** Atomic parameters of LuMgGaO<sub>4</sub>

| Atom | Wyck. | S.O.F. | x/a | y/b | z/c       | U [Å <sup>2</sup> ] |
|------|-------|--------|-----|-----|-----------|---------------------|
| Lu1  | 3a    | 1      | 0   | 0   | 0         | 0.0198              |
| Mg1  | 6c    | 0.5    | 0   | 0   | 0.2177(3) | 0.6281              |
| Ga1  | 6c    | 0.5    | 0   | 0   | 0.2177(3) | 0.0048              |
| O1   | 6c    | 1      | 0   | 0   | 0.2954(1) | 0.0056              |
| O2   | 6c    | 1      | 0   | 0   | 0.1303(5) | 0.0329              |

**Table S3** Atomic parameters of LuMgGaO<sub>4</sub>:Bi<sup>3+</sup>

| Atom | Wyck. | S.O.F. | x/a | y/b | z/c       | U [Å <sup>2</sup> ] |
|------|-------|--------|-----|-----|-----------|---------------------|
| Lu1  | 3a    | 0.997  | 0   | 0   | 0         | 0.0238              |
| Bi1  | 3a    | 0.003  | 0   | 0   | 0         | 0.0257              |
| Mg1  | 6c    | 0.5    | 0   | 0   | 0.2205(6) | 0.0355              |
| Ga1  | 6c    | 0.5    | 0   | 0   | 0.2205(6) | 0.0146              |
| O1   | 6c    | 1      | 0   | 0   | 0.2923(6) | 0.0016              |
| O2   | 6c    | 1      | 0   | 0   | 0.1274(6) | 0.0837              |

**Table S4** Atomic parameters of LuZnGaO<sub>4</sub>

| Atom | Wyck. | S.O.F. | x/a | y/b | z/c       | U [Å <sup>2</sup> ] |
|------|-------|--------|-----|-----|-----------|---------------------|
| Lu1  | 3a    | 1      | 0   | 0   | 0         | 0.0198              |
| Zn1  | 6c    | 0.5    | 0   | 0   | 0.2155(1) | 0.0503              |
| Ga1  | 6c    | 0.5    | 0   | 0   | 0.2155(1) | 0.0165              |
| O1   | 6c    | 1      | 0   | 0   | 0.2912(6) | 0.0216              |

|    |    |   |   |   |           |         |
|----|----|---|---|---|-----------|---------|
| O2 | 6c | 1 | 0 | 0 | 0.1258(5) | -0.0147 |
|----|----|---|---|---|-----------|---------|

**Table S5** Atomic parameters of LuZnGaO<sub>4</sub>:Bi<sup>3+</sup>

| Atom | Wyck. | S.O.F. | x/a | y/b | z/c       | U [Å <sup>2</sup> ] |
|------|-------|--------|-----|-----|-----------|---------------------|
| Lu1  | 3a    | 0.997  | 0   | 0   | 0         | 0.0093              |
| Bi1  | 3a    | 0.003  | 0   | 0   | 0         | 0.0087              |
| Zn1  | 6c    | 0.5    | 0   | 0   | 0.2198(6) | 0.0489              |
| Ga1  | 6c    | 0.5    | 0   | 0   | 0.2198(6) | 0.0146              |
| O1   | 6c    | 1      | 0   | 0   | 0.2918(2) | 0.0107              |
| O2   | 6c    | 1      | 0   | 0   | 0.1352(2) | 0.0029              |

**Table S6** Bond length (d) data of LuMgGaO<sub>4</sub> obtained from Rietveld refinement.

| Atom1 | Atom2 | Conut | d (Å)  |
|-------|-------|-------|--------|
|       | O1    | 6×    | 2.1773 |
| Lu    | Mg/Ga | 6×    | 3.5098 |
|       | Lu    | 6×    | 3.3880 |
|       | O1    | 1×    | 1.9579 |
| Mg/Ga | O2    | 3×    | 1.9914 |
|       | O2    | 1×    | 2.2033 |

**Table S7** Bond length (d) data of LuZnGaO<sub>4</sub> obtained from Rietveld refinement.

| Atom1 | Atom2 | Conut | d (Å)  |
|-------|-------|-------|--------|
|       | O1    | 6×    | 2.2303 |
| Lu    | Mg/Ga | 6×    | 3.5612 |
|       | Lu    | 6×    | 3.3984 |
|       | O1    | 1×    | 1.9115 |

|       |    |    |        |
|-------|----|----|--------|
| Zn/Ga | O2 | 3× | 1.9725 |
|       | O2 | 1× | 2.2611 |

**Table S8** Values of each parameter for the calculation of Bi<sup>3+</sup> pairs energy

|      | $\chi_{\text{CN}}$ | $k_{\text{CN}}$ | $\alpha_{\text{CN}}$ | $d_{\text{host}}$ | $r(\text{Bi}^{3+})$ | $r(\text{X})$ | $r(\text{X}')$ |
|------|--------------------|-----------------|----------------------|-------------------|---------------------|---------------|----------------|
| LMGO | 1.4                | 65857           | 2.518                | 3.3880            | 1.03                | 0.861         | 0.861          |
| LZGO | 1.4                | 65857           | 2.518                | 3.3984            | 1.03                | 0.861         | 0.861          |

**Table S9** Values of each parameter for the calculation of E<sub>sp</sub> energy

|      | E <sub>A</sub> | K     | $\alpha$ | $f_c(\text{M-Xi})$ | $\alpha(\text{M-Xi})$ | Q(Xi)              | Q(M)   | h <sub>e</sub> | N(M)    |
|------|----------------|-------|----------|--------------------|-----------------------|--------------------|--------|----------------|---------|
| LMGO | 9.41           | 0.555 | 0.24     | 0.076              | 0.482                 | 2.29               | 3.44   | 1.153          | 6       |
| LZGO | 9.41           | 0.555 | 0.24     | 0.094              | 0.567                 | 1.99               | 2.98   | 1.123          | 6       |
|      | N(M-Xi)        | N(Xi) | N(Xi-M)  | Z                  | $\omega(\text{M})$    | $\omega(\text{A})$ | BVP(M) | d(M-Xi)        | d(A-Xi) |
| LMGO | 6              | 4     | 3        | 3                  | 3                     | 6                  | 1.971  | 2.1773         | 1.9579  |
| LZGO | 6              | 4     | 3        | 3                  | 3                     | 6                  | 1.971  | 2.2303         | 1.9115  |

**Table S10** Precise values of each parameter for the calculation of MMCT energy

|      |                                    | $x(\text{Lu}^{3+})$ | $x(\text{Ga}^{3+})$ | $d_{\text{host}}$ | $r(\text{Bi}^{3+})$ | $r(\text{host})$ | $d_{\text{corr}}$ |
|------|------------------------------------|---------------------|---------------------|-------------------|---------------------|------------------|-------------------|
| LMGO | Bi <sup>3+</sup> -Lu <sup>3+</sup> | 1.431               | /                   | 3.3880            | 1.03                | 0.861            | 3.4725            |
|      | Bi <sup>3+</sup> -Ga <sup>3+</sup> | /                   | 1.652               | 3.5098            | 1.03                | 0.861            | 3.5943            |
| LZGO | Bi <sup>3+</sup> -Lu <sup>3+</sup> | 1.431               | /                   | 3.3984            | 1.03                | 0.861            | 3.4829            |

|                                 |   |       |        |      |       |        |
|---------------------------------|---|-------|--------|------|-------|--------|
| $\text{Bi}^{3+}\text{-Ga}^{3+}$ | / | 1.652 | 3.5612 | 1.03 | 0.861 | 3.6457 |
| $\text{Bi}^{3+}\text{-Zn}^{2+}$ | / | 1.371 | 3.5612 | 1.03 | 0.861 | 3.6457 |

**Table S11** Values of the parameters specific to  $\text{LuXnGaO}_4\text{:Bi}^{3+}$  ( $\text{Xn} = \text{Zn, Mg}$ ) for the calculations of the critical distance.

|      | $x_c$  | $V (\text{\AA}^3)$ | $Z$ |
|------|--------|--------------------|-----|
| LMGO | 0.0060 | 250.65 (1)         | 21  |
| LZGO | 0.0045 | 252.27(1)          | 21  |

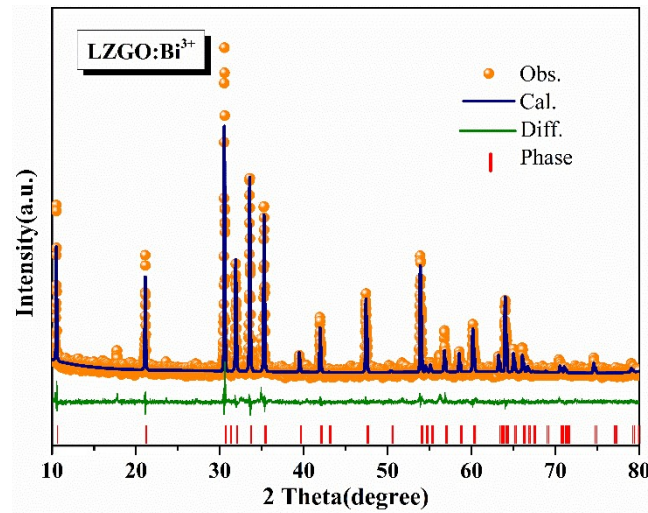

**Fig. S1** Refinement pattern of  $\text{LZGO:Bi}^{3+}$ .

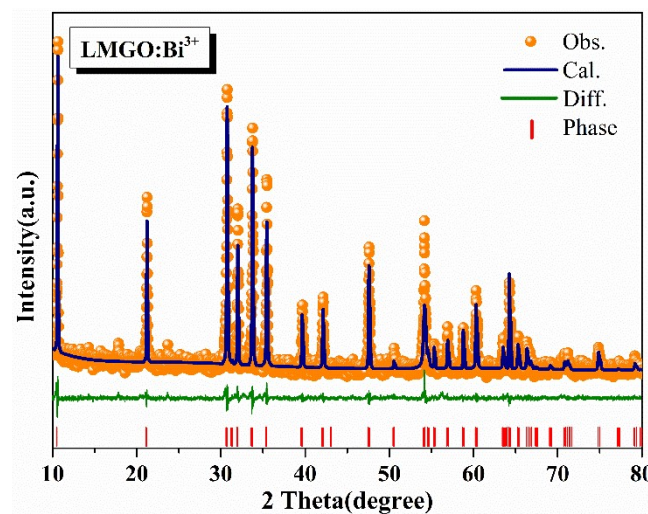

**Fig. S2** Refinement pattern of  $\text{LMGO:Bi}^{3+}$ .

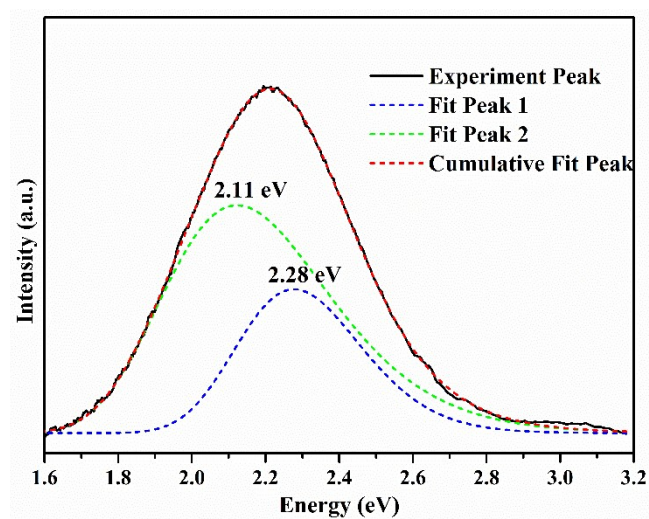

Fig. S3 Gaussian fitting of the emission spectrum of LZGO:Bi<sup>3+</sup>.

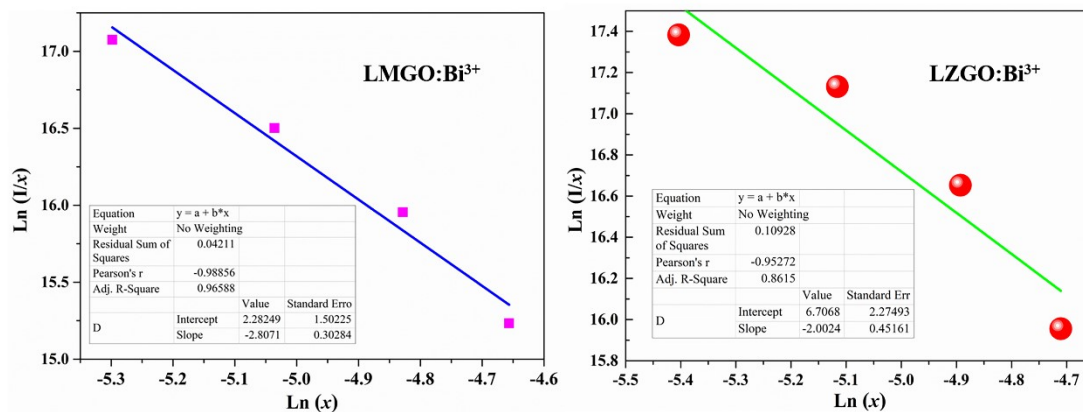

Fig. S4 Relationship between Ln(I/x) and Ln(x) for LuXnGaO<sub>4</sub>:Bi<sup>3+</sup> (Xn = Zn, Mg).
